# Supplementary material for: The Manchester Acute Coronary Syndromes (MACS) decision rule for suspected cardiac chest pain: derivation and external validation
Source: HighWire-hosted journal article supplement (doi:10.1136/heartjnl-2014-305564), 2014-04-29
Supplement: heartjnl-2014-305564supp.pdf [file heartjnl-2014-305564supp.pdf]

## Supplementary Appendix

Table 1: Analytical characteristics of the biomarkers assays considered for inclusion in the final model

| Biomarker                                      | Manufacturer/assay                                                                                        | Analytical characteristics                                                                                                | Medium                                                                   | AUC (95% CI) for MACE (derivation study) |
|------------------------------------------------|-----------------------------------------------------------------------------------------------------------|---------------------------------------------------------------------------------------------------------------------------|--------------------------------------------------------------------------|------------------------------------------|
| Troponin T                                     | Roche Diagnostics<br>4 <sup>th</sup> generation Elecsys                                                   | LOD 10ng/L<br>10% CV 35ng/L<br>99 <sup>th</sup> percentile 10ng/L                                                         | Serum                                                                    | 0.81 (0.76 – 0.86)                       |
| High sensitivity troponin T                    | Roche Diagnostics<br>5 <sup>th</sup> generation Elecsys                                                   | LOB 3ng/L<br>LOD 5ng/L<br>10% CV 13ng/L<br>99 <sup>th</sup> percentile 14ng/L                                             | Serum                                                                    | 0.89 (0.86 – 0.93)                       |
| Heart-type fatty acid binding protein (H-FABP) | Randox Laboratories<br>County Antrim,<br>Northern Ireland<br>Cardiac Plus Array,<br>Evidence Investigator | Measuring range 0-<br>100ng/L<br>Sensitivity 0.15ng/L<br>95 <sup>th</sup> percentile<br>2.5ng/ml<br>CV 9.1% at 3.1ng/ml   | Serum                                                                    | 0.86 (0.83 – 0.90)                       |
| Creatine kinase-MB                             | Randox Laboratories<br>County Antrim,<br>Northern Ireland<br>Cardiac Plus Array,<br>Evidence Investigator | Measuring range 0-<br>100ng/ml<br>Sensitivity 0.4ng/ml<br>95 <sup>th</sup> percentile<br>1.92ng/ml<br>CV 5.7% at 3.8ng/ml | Serum                                                                    | 0.79 (0.74 – 0.83)                       |
| Myoglobin                                      | Randox Laboratories<br>County Antrim,<br>Northern Ireland<br>Cardiac Plus Array,<br>Evidence Investigator | Measuring range 0-<br>700ng/ml<br>Sensitivity 1.8ng/ml<br>95 <sup>th</sup> percentile 66ng/ml<br>CV 8.8% at 83ng/ml       | Serum                                                                    | 0.76 (0.72 – 0.81)                       |
| P-selectin                                     | R&D Systems<br>(Abingdon, UK)<br>DuoSet ELISA                                                             | Dynamic range 0-<br>5ng/ml<br>Analytical sensitivity<br>0.026ng/ml                                                        | Plasma                                                                   | 0.66 (0.61 – 0.70)                       |
| E-selectin                                     | R&D Systems<br>(Abingdon, UK)<br>DuoSet ELISA                                                             | Dynamic range 0-<br>6ng/ml<br>Analytical sensitivity<br>0.10ng/ml                                                         | Plasma                                                                   | 0.54 (0.49 – 0.60)                       |
| Pregnancy-associated plasma protein A (PAPP-A) | Demeditec<br>Diagnostics (Kiel,<br>Germany)<br>Ultra-sensitive ELISA                                      | Dynamic range 0 –<br>450ng/ml<br>Analytical sensitivity<br>0.023ng/ml                                                     | Serum                                                                    | 0.55 (0.49 – 0.60)                       |
| Thrombospondin-1 (TSP-1)                       | R&D Systems<br>(Abingdon, UK)<br>Quantikine ELISA                                                         | Dynamic range 0 –<br>500ng/ml<br>Analytical sensitivity<br>0.095ng/ml                                                     | CTAD (citrate,<br>theophylline,<br>adenosine,<br>dipyridamole)<br>plasma | 0.54 (0.49 – 0.60)                       |
| Soluble CD40 ligand                            | R&D Systems                                                                                               | Dynamic range 0-                                                                                                          | CTAD plasma                                                              | 0.51 (0.45                               |

|            |                                |                                                                                  |       |                       |
|------------|--------------------------------|----------------------------------------------------------------------------------|-------|-----------------------|
| (CD40L)    | (Abingdon, UK)<br>DuoSet ELISA | 300pg/ml<br>Analytical sensitivity<br>1.07pg/ml                                  |       | - 0.56)               |
| NT-pro-BNP | Roche Diagnostics<br>Elecsys   | LOD 1pg/ml<br>Range 0 – 25000pg/ml<br>Functional sensitivity<br>(20% CV) 10pg/ml | Serum | 0.72 (0.68<br>– 0.77) |

(Analytical characteristics provided by the manufacturers)

**Table 2: Summary of univariate analyses demonstrating the predictive value of individual variables recorded at the time of presentation for the primary outcome of major adverse cardiac events (MACE) at 30 days (derivation study). In univariate analyses, all available data was utilised, thus data from patients without an available serum sample were included. (n=796, of whom 186 had MACE). Statistically significant predictors (p<0.05) are in bold type**

| Variable                                    | Odds ratio (95% CI)<br>for MACE within 30<br>days<br>[primary outcome] | Odds ratio (95% CI)<br>for AMI (prevalent) | Odds ratio (95% CI)<br>for incident MACE<br>within 30 days<br>(excluding prevalent<br>AMI) |
|---------------------------------------------|------------------------------------------------------------------------|--------------------------------------------|--------------------------------------------------------------------------------------------|
| Male sex*                                   | <b>1.66 (1.17 – 2.36)</b>                                              | <b>1.67 (1.15 – 2.45)</b>                  | <b>1.81 (1.21 – 2.71)</b>                                                                  |
| Age (years)*                                | <b>1.03 (1.02 – 1.04)</b>                                              | <b>1.03 (1.01 – 1.04)</b>                  | <b>1.02 (1.00 – 1.03)</b>                                                                  |
| Rest pain                                   | 0.75 (0.47 – 1.19)                                                     | 0.71 (0.43 – 1.15)                         | 0.69 (0.41 – 1.13)                                                                         |
| Previously identified as<br>ischaemic pain  | 1.00 (0.70 – 1.44)                                                     | 0.71 (0.47 – 1.07)                         | 0.93 (0.62 – 1.40)                                                                         |
| Worsening angina*                           | 1.43 (0.94 – 2.17)                                                     | 0.72 (0.43 – 1.20)                         | <b>1.64 (1.04 – 2.57)</b>                                                                  |
| Any radiation of pain                       | 1.17 (0.81 – 1.70)                                                     | 1.05 (0.71 – 1.57)                         | 1.31 (0.85 – 2.01)                                                                         |
| Pain radiation to back                      | 0.88 (0.54 – 1.43)                                                     | 0.84 (0.49 – 1.42)                         | 1.05 (0.62 – 1.78)                                                                         |
| Pain radiation to epigastrium               | 0.65 (0.08 – 5.63)                                                     | 0.84 (0.10 – 7.24)                         | 0.00                                                                                       |
| Pain radiation to jaw, neck or<br>throat    | 0.87 (0.56 – 1.36)                                                     | 0.78 (0.48 – 1.28)                         | 0.76 (0.56 – 1.51)                                                                         |
| Pain radiation to left shoulder<br>or arm   | 1.23 (0.88 – 1.73)                                                     | 1.23 (0.86 – 1.77)                         | 1.25 (0.86 – 1.82)                                                                         |
| Pain radiation to right shoulder<br>or arm* | <b>2.53 (1.57 – 4.07)</b>                                              | <b>2.49 (1.52 – 4.10)</b>                  | <b>2.75 (1.66 – 4.56)</b>                                                                  |
| Pain radiation to both<br>shoulders or arms | <b>2.64 (1.50 – 4.65)</b>                                              | <b>2.69 (1.50 – 4.83)</b>                  | <b>2.62 (1.44 – 4.76)</b>                                                                  |
| Pain in central chest*                      | <b>1.75 (1.19 – 2.58)</b>                                              | <b>2.49 (1.58 – 3.91)</b>                  | <b>1.70 (1.10 – 2.64)</b>                                                                  |
| Pain in right anterior chest                | 0.85 (0.34 – 2.12)                                                     | 0.87 (0.33 – 2.32)                         | 0.76 (0.26 – 2.23)                                                                         |
| Pain in left anterior chest*                | <b>0.54 (0.36 – 0.81)</b>                                              | <b>0.35 (0.21 – 0.57)</b>                  | <b>0.58 (0.37 – 0.91)</b>                                                                  |
| Pain in left lateral chest                  | 0.75 (0.21 – 2.67)                                                     | 0.97 (0.27 – 3.44)                         | 0.68 (0.15 – 3.04)                                                                         |
| Pain character: heavy/pressure              | 1.25 (0.88 – 1.76)                                                     | 1.32 (0.92 – 1.91)                         | 1.32 (0.90 – 1.93)                                                                         |
| Pain character:<br>burning/indigestion-like | 1.31 (0.68 – 2.55)                                                     | 1.18 (0.57 – 2.43)                         | 1.77 (0.89 – 3.50)                                                                         |
| Pain character: tight/squeezing             | 1.23 (0.87 – 1.73)                                                     | 1.00 (0.69 – 1.46)                         | 1.22 (0.83 – 1.80)                                                                         |
| Pain character: dull                        | 0.81 (0.53 – 1.25)                                                     | 0.90 (0.57 – 1.42)                         | 0.75 (0.46 – 1.23)                                                                         |
| Pain character: sharp/stabbing*             | <b>0.53 (0.31 – 0.90)</b>                                              | 0.60 (0.34 – 1.05)                         | <b>0.48 (0.26 – 0.91)</b>                                                                  |
| Reported sweating*                          | <b>1.68 (1.20 – 2.34)</b>                                              | <b>1.70 (1.19 – 2.42)</b>                  | <b>1.76 (1.21 – 2.56)</b>                                                                  |
| Reported dyspnoea*                          | <b>1.56 (1.12 – 2.18)</b>                                              | 1.38 (0.97 – 1.97)                         | 1.43 (0.99 – 2.08)                                                                         |
| Reported nausea                             | 1.31 (0.93 – 1.83)                                                     | 1.32 (0.92 – 1.89)                         | 1.34 (0.92 – 1.95)                                                                         |
| Reported vomiting*                          | <b>3.70 (2.15 – 6.38)</b>                                              | <b>3.61 (2.08 – 6.28)</b>                  | <b>3.31 (1.88 – 5.83)</b>                                                                  |
| Reported paraesthesiae                      | 0.81 (0.54 – 1.22)                                                     | 0.76 (0.49 – 1.19)                         | 0.86 (0.55 – 1.35)                                                                         |
| Pleuritic nature                            | 0.79 (0.42 – 1.48)                                                     | 0.73 (0.37 – 1.47)                         | 0.64 (0.30 – 1.38)                                                                         |
| Symptom – presentation time<br>(h)          | 0.91 (0.87 – 0.95)                                                     | 0.90 (0.85 – 0.95)                         | 0.92 (0.87 – 0.97)                                                                         |
| Previous myocardial infarction              | 1.22 (0.84 – 1.77)                                                     | 0.86 (0.56 – 1.30)                         | 1.23 (0.81 – 1.86)                                                                         |

|                                                            |                                 |                                |                            |
|------------------------------------------------------------|---------------------------------|--------------------------------|----------------------------|
| Previous coronary intervention                             | 1.03 (0.68 – 1.54)              | 0.65 (0.40 – 1.06)             | 1.20 (0.77 – 1.87)         |
| History of hyperlipidaemia                                 | 0.91 (0.65 – 1.26)              | 0.68 (0.47 – 0.97)             | 1.03 (0.71 – 1.49)         |
| History of hypertension                                    | 1.18 (0.85 – 1.63)              | 0.98 (0.69 – 1.39)             | 1.01 (0.70 – 1.46)         |
| History of diabetes mellitus*                              | <b>1.51 (1.00 – 2.26)</b>       | 0.99 (0.62 – 1.58)             | 1.54 (0.99 – 2.40)         |
| History of angina                                          | 0.99 (0.70 – 1.41)              | 0.58 (0.39 – 0.88)             | 1.02 (0.69 – 1.52)         |
| History of undiagnosed chest pain                          | <b>0.54 (0.34 – 0.85)</b>       | <b>0.53 (0.32 – 0.88)</b>      | <b>0.47 (0.27 – 0.81)</b>  |
| History of cerebrovascular disease                         | 1.28 (0.75 – 2.19)              | 0.94 (0.51 – 1.74)             | 1.21 (0.66 – 2.19)         |
| History of peripheral vascular disease                     | 1.20 (0.38 – 3.80)              | 1.05 (0.29 – 3.77)             | 1.21 (0.34 – 4.34)         |
| Current tobacco smoker                                     | <b>1.77 (1.26 – 2.50)</b>       | <b>2.15 (1.49 – 3.08)</b>      | <b>2.12 (1.45 – 3.09)</b>  |
| Family history of coronary heart disease                   | 0.79 (0.56 – 1.09)              | 0.72 (0.51 – 1.04)             | 0.92 (0.64 – 1.34)         |
| Current aspirin use                                        | 0.83 (0.60 – 1.16)              | <b>0.58 (0.40 – 0.84)</b>      | 0.80 (0.55 – 1.16)         |
| Current clopidogrel use                                    | 0.96 (0.58 – 1.59)              | 0.74 (0.42 – 1.33)             | 0.87 (0.48 – 1.55)         |
| Current statin use                                         | 0.94 (0.67 – 1.30)              | 0.67 (0.47 – 0.97)             | 0.87 (0.60 – 1.26)         |
| Current ACE inhibitor use                                  | 0.94 (0.64 – 1.40)              | 0.80 (0.52 – 1.23)             | 0.95 (0.61 – 1.48)         |
| Current beta blocker use                                   | 0.94 (0.64 – 1.37)              | 0.65 (0.42 – 1.00)             | 0.81 (0.52 – 1.25)         |
| Hypotension (systolic blood pressure <100mmHg) on arrival* | <b>5.26 (2.32 – 11.93)</b>      | <b>4.88 (2.18 – 10.93)</b>     | <b>4.02 (1.79 – 9.06)</b>  |
| Bradycardia (heart rate <60 beats per minute) on arrival   | 1.47 (0.91 – 2.39)              | 1.23 (0.72 – 2.10)             | <b>1.91 (1.15 – 3.17)</b>  |
| Tachycardia (heart rate >100 beats per minute) on arrival* | <b>1.90 (1.17 – 3.09)</b>       | <b>1.84 (1.10 – 3.07)</b>      | <b>1.52 (0.94 – 2.78)</b>  |
| Basal crepitations on auscultation of lung fields*         | <b>1.94 (1.20 – 3.13)</b>       | <b>1.78 (1.07 – 2.95)</b>      | 1.45 (0.84 – 2.50)         |
| Abdominal tenderness                                       | 0.66 (0.38 – 1.14)              | 0.55 (0.29 – 1.04)             | 0.71 (0.38 – 1.31)         |
| Sweating observed by clinician*                            | <b>7.49 (4.70 – 11.93)</b>      | <b>8.93 (5.59 – 14.28)</b>     | <b>6.52 (4.09 – 10.39)</b> |
| Chest wall tender                                          | 1.22 (0.84 – 1.78)              | 1.05 (0.69 – 1.58)             | 1.37 (0.91 – 2.07)         |
| Elevated jugular venous pressure                           | 0.69 (0.38 – 1.27)              | 0.83 (0.44 – 1.54)             | 0.68 (0.34 – 1.37)         |
| ECG: Acute ischaemic features*                             | <b>9.50 (6.56 – 13.75)</b>      | <b>10.14 (6.81 – 15.10)</b>    | <b>8.65 (5.75 – 13.00)</b> |
| ECG: ST elevation myocardial infarction§                   | <b>290.00 (39.82 – 2112.02)</b> | <b>130.25 (40.01 – 424.00)</b> | 26.80 (13.97 – 51.42)      |
| ECG: Left bundle branch block                              | 2.25 (1.00 – 5.11)              | 2.03 (0.86 – 4.80)             | 1.54 (0.61 – 3.94)         |

\* Considered for inclusion in the final model

§ Collinear with acute ischaemic features (which incorporates ST elevation MI) therefore not

considered for inclusion in the final model

**Table 3:** Multivariate model detailing the components of the MACS rule with tobacco smoking included as a covariate. (Rounded values are presented).

| Variable                               | Constant | Odds ratio (95% CI) | P value |
|----------------------------------------|----------|---------------------|---------|
| High sensitivity troponin T*           | 0.070    | 1.1 (1.0 – 1.1)     | <0.0001 |
| Heart-type fatty acid binding protein* | 0.17     | 1.2 (1.0 -1.4)      | 0.026   |
| ECG ischaemia                          | 1.83     | 6.3 (3.3 – 11.8)    | <0.0001 |
| Sweating observed                      | 1.82     | 6.2 (2.9 – 13.0)    | <0.0001 |
| Vomiting                               | 1.59     | 4.9 (1.7 – 14.4)    | 0.004   |
| Systolic blood pressure <100mmHg       | 1.48     | 4.4 (1.2 – 16.0)    | 0.026   |
| Worsening angina                       | 1.00     | 2.7 (1.3 – 5.7)     | 0.007   |
| Tobacco smoking (current)              | 0.78     | 2.2 (1.1 – 4.3)     | 0.03    |
| Constant                               | -5.01    | -                   | -       |

\* Odds ratios are presented for a 1 unit increase (ng/L for hs-cTnT; ng/ml for H-FABP)

**Table 4:** Performance of the alternative MACS decision rule with tobacco smoking included

|                     |                         | Very low risk | Low risk   | Moderate risk | High risk  |
|---------------------|-------------------------|---------------|------------|---------------|------------|
| Derivation<br>study | Number with<br>AMI (%)  | 0 (0.0)       | 4 (2.7)    | 50 (19.8)     | 76 (98.7)  |
|                     | Number with<br>MACE (%) | 1 (0.5)       | 6 (4.0)    | 73 (28.9)     | 77 (100.0) |
|                     | Total number<br>(%)     | 219 (31.4)    | 149 (21.3) | 253 (36.2)    | 77 (11.0)  |
| Validation<br>study | Number with<br>AMI (%)  | 0 (0.0)       | 0 (0.0)    | 37 (17.6)     | 42 (89.4)  |
|                     | Number with<br>MACE (%) | 2 (1.7)*      | 4 (4.6)    | 48 (22.9)     | 44 (93.6)  |
|                     | Total number<br>(%)     | 119 (25.7)    | 87 (18.8)  | 210 (45.4)    | 47 (10.2)  |

Abbreviations: AMI, acute myocardial infarction; MACE, major adverse cardiac events

\* Both coronary stenoses, identified on an outpatient basis. Neither patient underwent revascularisation within 30 days.
